# Supplementary material
Source: PubMed Central journal article supplement (PMC7240827)
Supplement: ao0c00075_si_001.pdf [file ao0c00075_si_001.pdf]

1           **Comparison of Transcriptomics Changes Induced by TCS and**  
2           **MTCS Exposure in Human Hepatoma HepG2 Cells**

3   Xiaoqian Li<sup>a</sup>, Yu Shang<sup>b</sup>, Weiwei Yao<sup>b</sup>, Yi Li<sup>c</sup>, Ning Tang<sup>d</sup>, Jing An<sup>b\*</sup>, Yongjie Wei<sup>\*a</sup>

4   <sup>a</sup> State Key Laboratory of Environmental Criteria and Risk Assessment, Chinese  
5   Research Academy of Environmental Sciences, Beijing 100012, China

6   <sup>b</sup> School of Environmental and Chemical Engineering, Shanghai University, Shanghai  
7   200444, China

8   <sup>c</sup> State Key Laboratory of Severe Weather & Key Laboratory of Atmospheric  
9   Chemistry of CMA, Chinese Academy of Meteorological Sciences, Beijing 100081,  
10   China

11   <sup>d</sup> Institute of Nature and Environmental Technology, Kanazawa University,  
12   Kakuma-machi, Kanazawa, 920-1192, Japan

13

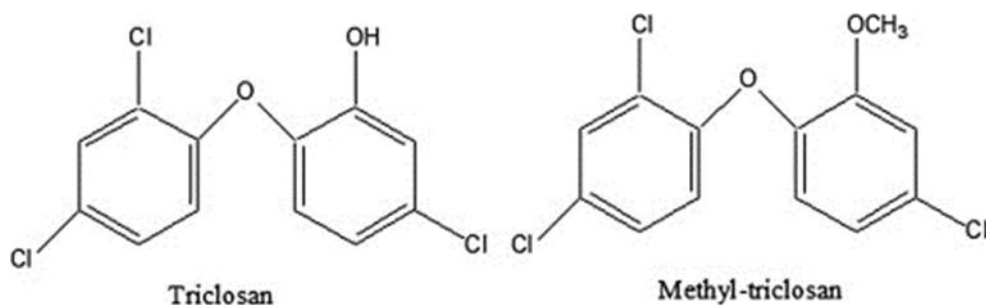

14  
15 **Figure S1. The chemical structure of Triclosan (TCS) and Methyl-triclosan**  
16 **(MTCS)**

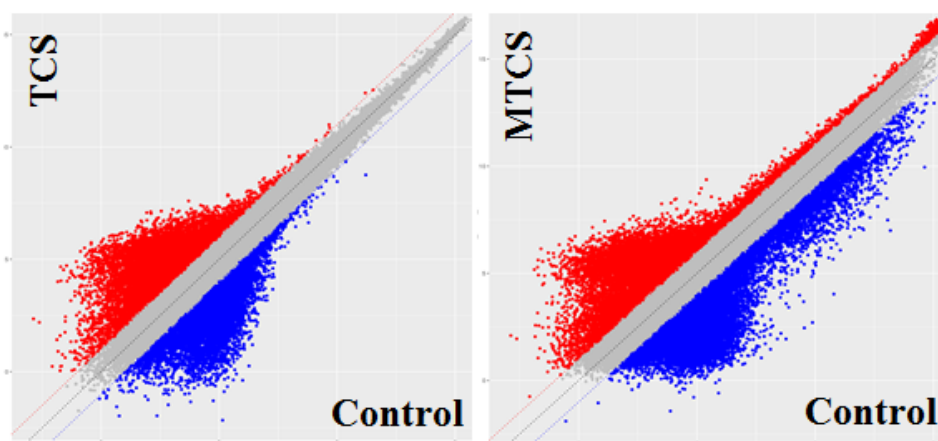

17  
18 **Figure S2. The scatter plot of GO terms induced with TCS and mTCS (vs.**  
19 **control).**

21 **Table S1. Quality parameters of RNA**

| Samples | Concentration (ng/ $\mu$ L) | Volume ( $\mu$ L) | Total ( $\mu$ g) | $A_{260}/A_{280}$ | RIN | 28S/18S |
|---------|-----------------------------|-------------------|------------------|-------------------|-----|---------|
| Control | 548.3                       | 200               | 109.66           | 1.96              | 9.5 | 2.0     |
| TCS     | 1302.6                      | 100               | 130.26           | 2.00              | 9.6 | 1.9     |
| MTCS    | 1111.6                      | 100               | 111.16           | 2.00              | 9.7 | 1.9     |

22 RNA Integrity Number (RIN) is an indicator of RNA integrity with the scores ordered  
23 from 0 to 10; and the higher score indicates the better RNA integrity.
